# Supplementary material
Source: Springer Nature journal article supplement (https://www.springermedizin.de/resource/supplementary/12957_2011_1063_MOESM2_ESM.pdf/9562136)

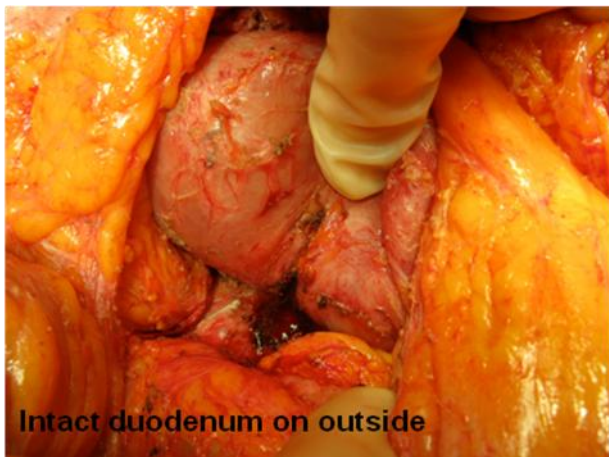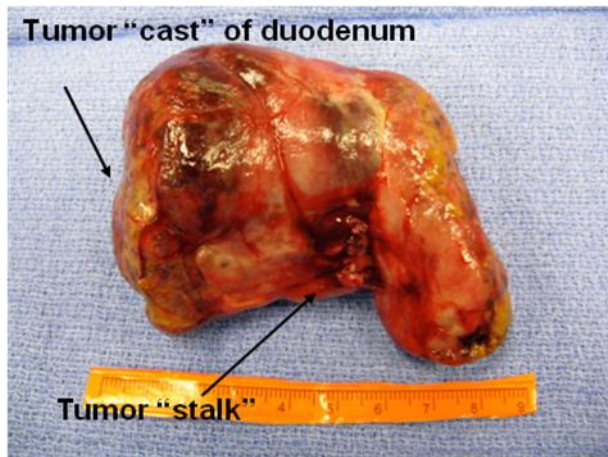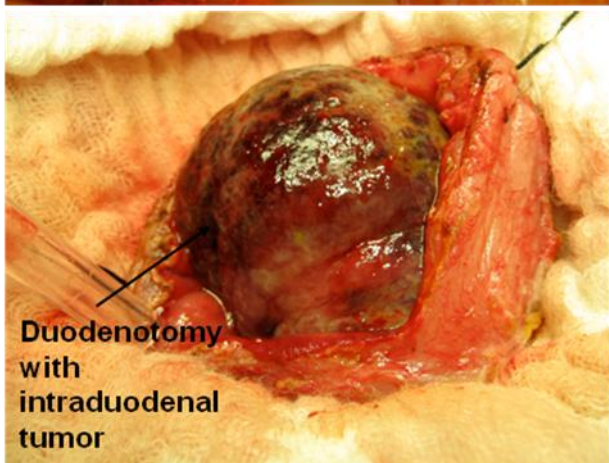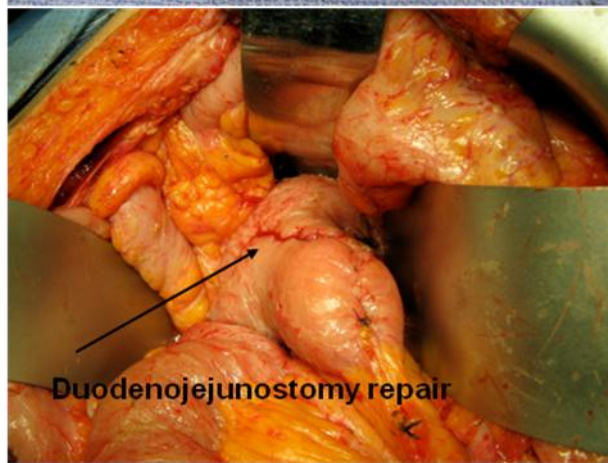

Supplement: MOESM2 [file 9562136]
